# Supplementary material for: Synergizing the multiple plasmon resonance coupling and quantum effects to obtain enhanced SERS and PEC performance simultaneously on a noble metal–semiconductor substrate
Source: Royal Society of Chemistry journal article supplement (doi:10.1039/c6nr08527j), 2017-01-01
Supplement: c6nr08527j1.pdf [file c6nr08527j1.pdf]

## Supplementary Information

# **Synergizing the multiple plasmons resonance coupling and quantum effects to obtain enhanced SERS and PEC performance simultaneously on noble metal- semiconductor substrate**

Tao Yang,<sup>a</sup> Wenna Liu,<sup>a</sup> Lidong Li,<sup>b</sup> Junhong Chen,<sup>b</sup> Xinmei Hou,<sup>\*, a</sup> and Kuo-Chih Chou<sup>a</sup>

<sup>a</sup> State Key Laboratory of Advanced Metallurgy, University of Science and Technology Beijing, Beijing 100083, China

<sup>b</sup> School of Material Science and Engineering, University of Science and Technology Beijing, Beijing 100083, China.

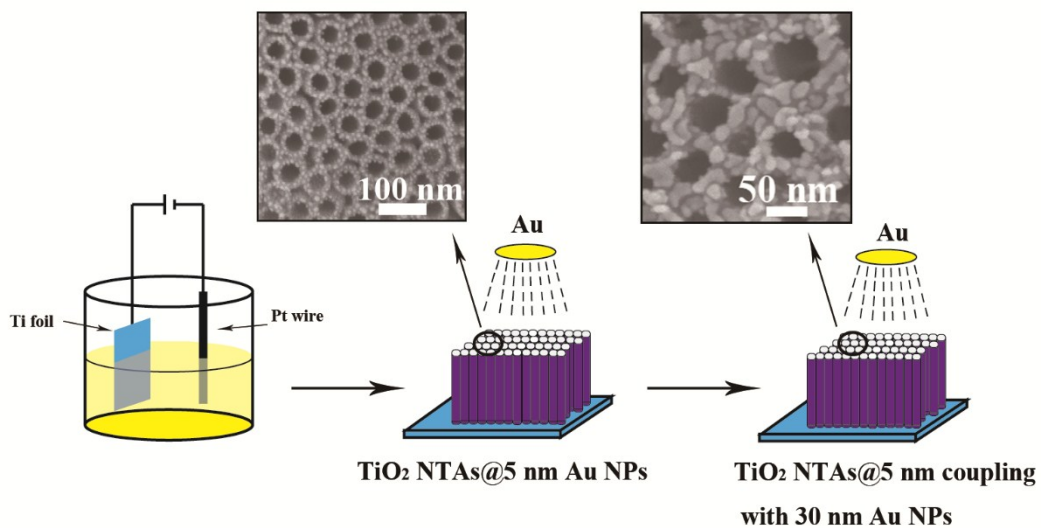

**Figure S1.** Scheme of the fabrication process of TiO<sub>2</sub> NTAs@hybrid Au NPs.

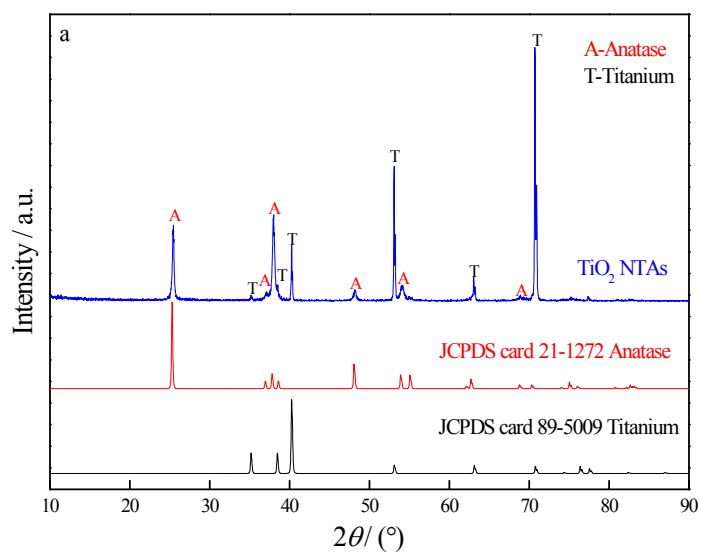

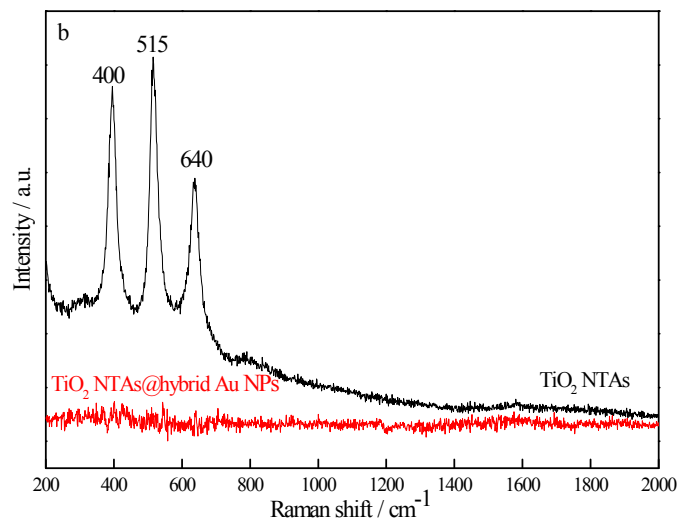

**Figure S2.** (a) XRD patterns of the synthesized sample. (b) Normal unenhanced Raman of  $\text{TiO}_2$  NTAs and  $\text{TiO}_2$  NTAs@hybrid Au NPs.

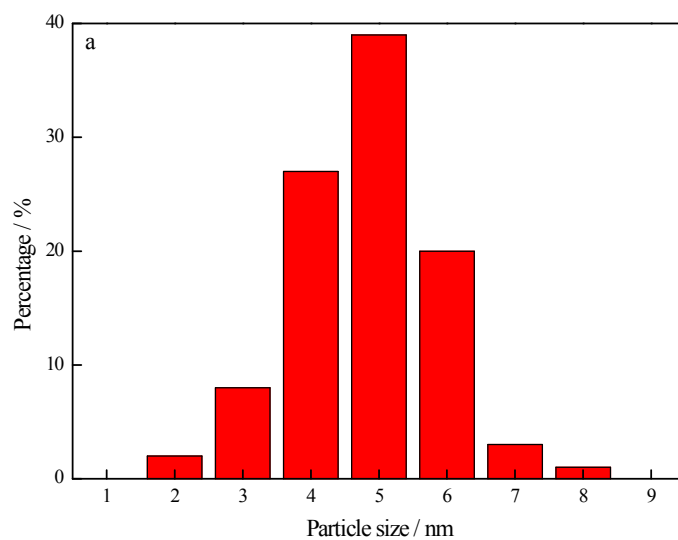

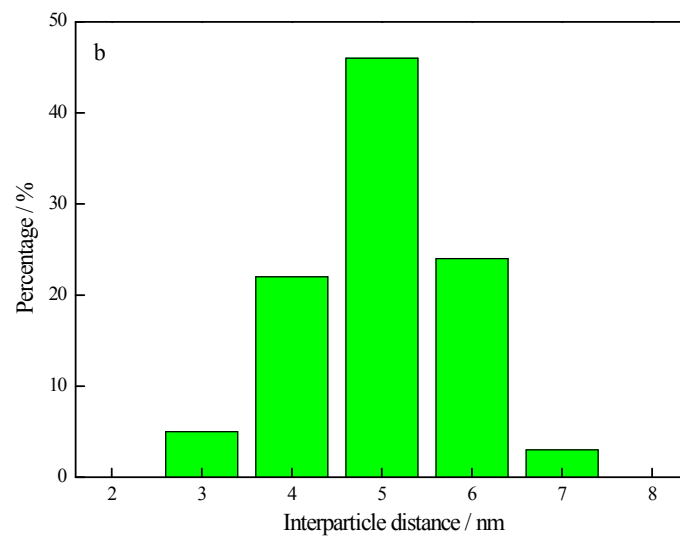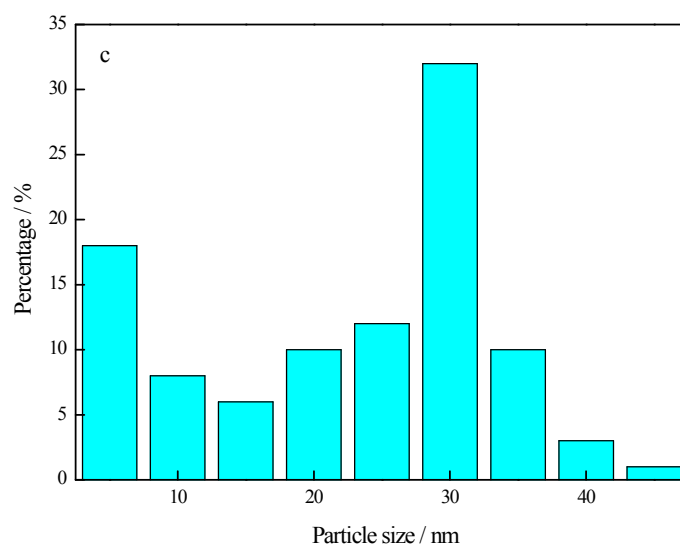

**Figure S3.** Au particle size distribution histograms of (a) TiO<sub>2</sub> NTAs@5 nm Au NPs (c) TiO<sub>2</sub> NTAs@5 nm coupling with 30 nm Au NPs. (b) distance-distribution histogram of interparticle (Au–Au)

gap.

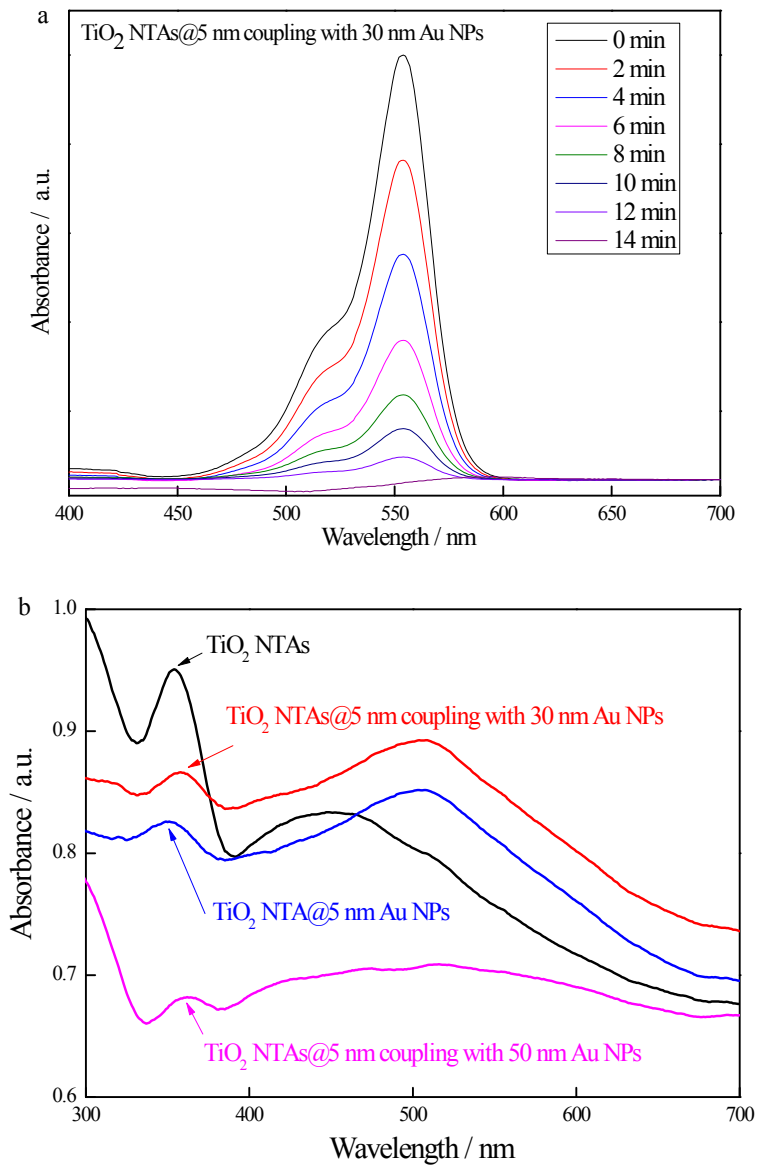

**Figure S4.** (a) UV-vis spectra of RhB dye after irradiation for different time in the presence of TiO<sub>2</sub> NTAs@5 nm coupling with 30 nm Au NPs. (b) The absorption spectra of different samples.

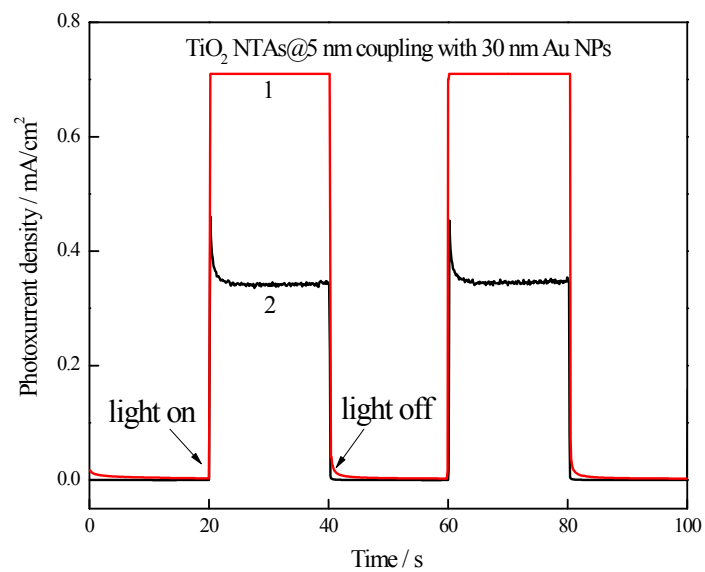

**Figure S5.** Photoresponse of TiO<sub>2</sub> NTAs@5 nm coupling with 30 nm Au NPs (1) with and (2) without a bias potential of 1 V (vs. SCE). All the results above were obtained under UV-cut Xe lamp irradiation ( $I_0 = 100 \text{ mW}\cdot\text{cm}^{-2}$ )

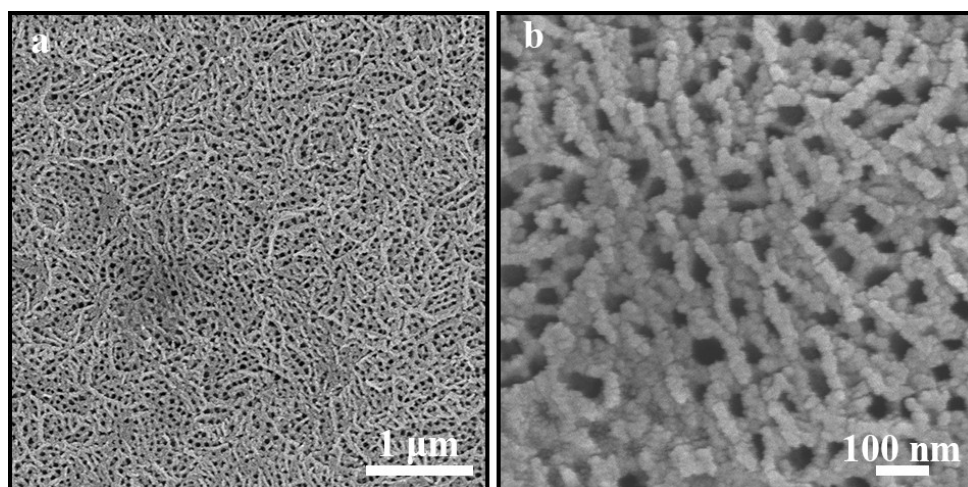

**Figure S6.** SEM images of TiO<sub>2</sub> NTAs@5nm coupling with 50 nm Au NPs.

**Table S1.** The SERS signal intensities of the peaks of 1340  $\text{cm}^{-1}$  using RhB with concentration from

10<sup>-6</sup> M to 10<sup>-10</sup> M.

| concentration ( $\text{mol}\cdot\text{L}^{-1}$ ) | intensity (counts) |
|--------------------------------------------------|--------------------|
| 10 <sup>-6</sup>                                 | 31744              |
| 10 <sup>-7</sup>                                 | 15846              |
| 10 <sup>-8</sup>                                 | 6488               |
| 10 <sup>-9</sup>                                 | 1415               |
| 10 <sup>-10</sup>                                | 568                |
